# Supplementary material for: Pharmacogenomics in diabetes: outcomes of thiamine therapy in TRMA syndrome
Source: Springer Nature journal article supplement (doi:10.1007/s00125-018-4554-x), 2018-02-15
Supplement: MOESM1 [file 15467930]

## **ELECTRONIC SUPPLEMENTARY MATERIAL**

International Neonatal diabetes consortium:

V Iotova (University Hospital 'St. Marina', Varna, Bulgaria), J Raza (National Institute of Child Health, Karachi, Pakistan), J Grulich-Henn (University Children's Hospital, University of Heidelberg, Heidelberg, Germany), K Matyka (Division of Metabolic and Vascular Health, Warwick, UK), IC Verma (Institute of Medical Genetics and Genomics, Sir Ganga Ram Hospital, New Delhi, India), I Perthus (Service de Génétique Médicale, CHU de Clermont-Ferrand, Clermont-Ferrand, France), R Casey (Alberta Health Services, Edmonton, Canada), P Taberner (Section of Nutrition and Diabetes, Children's General Hospital "Dr. Pedro de Elizalde", Buenos Aires, Argentina), R Bundak (Istanbul Faculty of Medicine, Department of Pediatrics, Pediatric Endocrinology Unit, Istanbul University, Istanbul, Turkey), A Malik (Frimley Children's Centre, Frimley, Surrey, UK), F Adriana (Federico II University Hospital, Napoli, Italy), S Soto (Department of Pediatrics, Roosevelt Hospital, 5ta Avenida Calzada Roosevelt, Zona 11, Guatemala City, Guatemala). M Hassan (Department of Pediatrics, Cairo university, Cairo, Egypt), R El-Kaffas (clinical and chemical pathology department, Cairo University, Egypt), A Abdelkader (Department of Pediatrics, Cairo University, Cairo, Egypt).

**Supplement table 1: demography and detailed genotype of the cohort**

| Patient                     | Country              | Consanguinity | Gender | <i>SLC19A2</i> mutation (Novel mutations in bold) |                 |                      |                                               |
|-----------------------------|----------------------|---------------|--------|---------------------------------------------------|-----------------|----------------------|-----------------------------------------------|
|                             |                      |               |        | Exon                                              | Mutation type   | Mutation name        | Nucleotide change                             |
| 1.1                         | Pakistan             | Yes           | Male   | <b>1</b>                                          | <b>Missense</b> | <b>p.L64P/p.L64P</b> | <b>c.191T&gt;C/c.191T&gt;C</b>                |
| 1.2                         | Pakistan             | Yes           | Female | <b>1</b>                                          | <b>Missense</b> | <b>p.L64P/p.L64P</b> | <b>c.191T&gt;C/c.191T&gt;C</b>                |
| 1.3                         | Pakistan             | Yes           | Male   | <b>1</b>                                          | <b>Missense</b> | <b>p.L64P/p.L64P</b> | <b>c.191T&gt;C/c.191T&gt;C</b>                |
| 2.1                         | Pakistan             | Yes           | Female | <b>1</b>                                          | <b>Nonsense</b> | <b>p.W30X/p.W30X</b> | <b>c.89G&gt;A/c.89G&gt;A</b>                  |
| 3.1 [16]                    | England              | Yes           | Female | 1                                                 | Nonsense        | p.E66X/p.E66X        | c.196G>T/c.196G>T                             |
| 4.1                         | India                | No            | Female | 1                                                 | Nonsense        | p.E66X/p.E66X        | c.196G>T/c.196G>T                             |
| 5.1 [16]                    | Germany / Kurdi Iraq | Yes           | Male   | 2                                                 | Nonsense        | p.Y79X/p.Y79X        | c.237C>A/c.237C>A                             |
| 6.1 [20]                    | Italy                | No            | Female | 2/6                                               | Nonsense        | p.Y81X/p.L457X       | c.242dup/c.1370del                            |
| 6.2 [20]                    | Italy                | No            | Female | 2/6                                               | Nonsense        | p.Y81X/p.L457X       | c.242dup/c.1370del                            |
| 7.1                         | Argentina            | No            | Female | <b>2</b>                                          | <b>Missense</b> | <b>p.A91P/p.A91P</b> | <b>c.271G&gt;C/c.271G&gt;C</b>                |
| 8.1                         | India                | Yes           | Female | 2                                                 | Missense        | p.G105E/p.G105E      | c.314G>A/c.314G>A                             |
| 9.1 [16]                    | Sudan                | Yes           | Male   | 2                                                 | Frameshift      | p.I109fs/p.I109fs    | c.327_334del/c.327_334del                     |
| 10.1                        | Sudan                | Yes           | Female | 2                                                 | Frameshift      | p.I109fs/p.I109fs    | c.327_334del/c.327_334del                     |
| 10.2                        | Sudan                | Yes           | Female | 2                                                 | Frameshift      | p.I109fs/p.I109fs    | c.327_334del/c.327_334del                     |
| 11.1 {Mikstiene, 2015 #293} | Saudi Arabia         | Yes           | Female | 2                                                 | Missense        | p.S143F/p.S143F      | c.428C>T/c.428C>T                             |
| 12.1                        | France               | No            | Female | 2                                                 | Missense        | p.S143F/p.S143F      | c.428C>T/c.428C>T                             |
| 13.1                        | Canada               | No            | Male   | 2                                                 | Frameshift      | p.G152X/p.G152X      | c.454_458delGGCATinsTA/c.454_458delGGCATinsTA |
| 14.1                        | Honduras             | No            | Male   | 2                                                 | Missense        | p.G172D/p/G172D      | c.515G>A/c.515G>A                             |
| 15.1                        | Turkey               | Yes           | Male   | 2                                                 | Frameshift      | p.S214fs/p.S214fs    | c.641del/c.641del                             |
| 16.1 [26]                   | England/iran         | Yes           | Female | 2                                                 | Nonsense        | p.Q233X/p.Q233X      | c.697C>T/c.697C>T                             |
| 17.1 [26]                   | England/iran         | No            | Male   | 2                                                 | Nonsense        | p.Q233X/p.Q233X      | c.697C>T/c.697C>T                             |
| 17.2 [26]                   | England/iran         | No            | Female | 2                                                 | Nonsense        | p.Q233X/p.Q233X      | c.697C>T/c.697C>T                             |

|              |                  |               |        |            |                          |                          |                                      |
|--------------|------------------|---------------|--------|------------|--------------------------|--------------------------|--------------------------------------|
| 18.1<br>[26] | England/<br>Iran | Yes           | Male   | 2          | Nonsense                 | p.Q233X/p.Q233X          | c.697C>T/c.697C>T                    |
| 19.1         | Honduras         | No            | Female | 2          | Nonsense                 | p.E254X/p.E254X          | c.759dupT/c.759dupT                  |
| 20.1         | KSA              | Yes           | Female | <b>3</b>   | <b>Nonsense</b>          | <b>p.W302X/p.W302X</b>   | <b>c.905G&gt;A/c.905G&gt;A</b>       |
| 21.1         | England          | No            | Male   | 3          | Missense                 | p.W320G/p.W320G          | c.958T>G/c.958T>G                    |
| 22.1         | Bulgaria         | No            | Female | <b>3</b>   | <b>Frameshift</b>        | <b>p.N333fs/p.N333fs</b> | <b>c.993_996dup/c.993_996dup</b>     |
| 23.1         | Czech Republic   | No            | Female | <b>1/3</b> | <b>Splicing/Missense</b> | <b>p.*/p.G334D</b>       | <b>c.204+2T&gt;G/c.1001G&gt;A</b>    |
| 24.1<br>[16] | Czech Republic   | No            | Female | 3/4        | Missense/<br>Frameshift  | p.G334D/p.V383fs         | c.1001G>A;<br>c.1148_1149del         |
| 25.1<br>[22] | India            | Not confirmed | Female | 3          | In-frame deletion        | p.G335del/p.G335del      | c.1002_1004del/c.1002_1004del        |
| 26.1         | Guatemala        | Not confirmed | Female | <b>4</b>   | <b>Frameshift</b>        | <b>p.M401fs/p.M401fs</b> | <b>c.1201_1202del/c.1201_1202del</b> |
| 27.1         | Egypt            | Yes           | Male   | 4          | <b>Nonsense</b>          | <b>p.W387x/p.W387x</b>   | <b>c.1160G&gt;A/c.1160G&gt;A.</b>    |
